# Supplementary material for: The sponge microbiome within the greater coral reef microbial metacommunity
Source: PubMed Central journal article supplement (PMC6456735; doi:10.1038/s41467-019-09537-8), 2019-04-09
Supplement: 41467_2019_9537_MOESM1_ESM.pdf [file 41467_2019_9537_MOESM1_ESM.pdf]

## **The sponge microbiome within the greater coral reef microbial metacommunity**

Cleary et al.

Supplementary Table 1.

Supplementary Figure 1.

Supplementary Figure 2.

Supplementary Figure 3.

Supplementary Figure 4.

Supplementary Figure 5.

Supplementary Figure 6.

Supplementary Figure 7.

| Phylum                                  | Class                 | Sequences | OTUs  |
|-----------------------------------------|-----------------------|-----------|-------|
| Proteobacteria                          |                       | 1191455   | 13592 |
|                                         | Gammaproteobacteria   | 573036    | 5815  |
|                                         | Alphaproteobacteria   | 422132    | 2086  |
|                                         | Deltaproteobacteria   | 93637     | 5187  |
|                                         | Betaproteobacteria    | 67233     | 204   |
|                                         | Epsilonproteobacteria | 9132      | 58    |
|                                         | ARKDMS-49             | 8893      | 20    |
| Bacteroidetes                           |                       | 159220    | 4290  |
| Chloroflexi                             |                       | 131590    | 839   |
| Tenericutes                             |                       | 131156    | 191   |
| Actinobacteria                          |                       | 101587    | 571   |
| Cyanobacteria                           |                       | 79405     | 437   |
| Acidobacteria                           |                       | 54725     | 1236  |
| Spirochaetae                            |                       | 45664     | 427   |
| Planctomycetes                          |                       | 43093     | 3469  |
| Thaumarchaeota                          |                       | 31926     | 60    |
| Nitrospirae                             |                       | 27075     | 141   |
| Gemmatimonadetes                        |                       | 23719     | 416   |
| Euryarchaeota                           |                       | 21322     | 100   |
| Verrucomicrobia                         |                       | 21190     | 886   |
| Tectomicrobia                           |                       | 11771     | 81    |
| Chlamydiae                              |                       | 11373     | 324   |
| Firmicutes                              |                       | 11333     | 520   |
| PAUC34f                                 |                       | 9535      | 69    |
| SBR1093                                 |                       | 9497      | 46    |
| Parcubacteria                           |                       | 7173      | 386   |
| Poribacteria                            |                       | 6132      | 58    |
| Lentisphaerae                           |                       | 5012      | 138   |
| Marinimicrobia (SAR406 clade)           |                       | 4073      | 69    |
| Nitrospinae                             |                       | 3218      | 55    |
| Deinococcus-Thermus                     |                       | 3194      | 28    |
| Latescibacteria                         |                       | 2657      | 214   |
| Fusobacteria                            |                       | 2230      | 36    |
| Woesearchaeota (DHVEG-6)                |                       | 2152      | 764   |
| Saccharibacteria                        |                       | 1875      | 168   |
| Deferribacteres                         |                       | 1597      | 80    |
| Gracilibacteria                         |                       | 928       | 79    |
| Peregrinibacteria                       |                       | 449       | 82    |
| Fibrobacteres                           |                       | 401       | 103   |
| Chlorobi                                |                       | 388       | 37    |
| Elusimicrobia                           |                       | 340       | 77    |
| Hydrogenedentes                         |                       | 330       | 66    |
| Omnitrophica                            |                       | 313       | 185   |
| BRC1                                    |                       | 125       | 63    |
| Ignavibacteriae                         |                       | 107       | 32    |
| SR1 (Absconditabacteria)                |                       | 81        | 22    |
| TM6 (Dependentiae)                      |                       | 78        | 68    |
| Armatimonadetes                         |                       | 62        | 8     |
| WA-aaa01f12                             |                       | 60        | 12    |
| KSB3 (Modulibacteria)                   |                       | 49        | 24    |
| Aminicenantes                           |                       | 38        | 16    |
| RBG-1 (Zixibacteria)                    |                       | 38        | 20    |
| WS2                                     |                       | 36        | 10    |
| uncultured archaeon                     |                       | 31        | 7     |
| Bathyarchaeota                          |                       | 30        | 18    |
| Acetothermia                            |                       | 29        | 8     |
| Marine Hydrothermal Vent Group(MHVG)    |                       | 25        | 12    |
| Aenigmarchaeota                         |                       | 19        | 16    |
| FCPU426                                 |                       | 17        | 9     |
| WWE3                                    |                       | 13        | 10    |
| LCP-89                                  |                       | 10        | 8     |
| Lokiarchaeota                           |                       | 8         | 8     |
| Candidatus Berkelbacteria               |                       | 7         | 7     |
| Microgenomates                          |                       | 7         | 6     |
| FL0428B-PF49                            |                       | 6         | 2     |
| Synergistetes                           |                       | 5         | 2     |
| Cloacimonetes                           |                       | 4         | 4     |
| Ancient Archaeal Group(AAG)             |                       | 3         | 2     |
| WSA2                                    |                       | 3         | 2     |
| AC1                                     |                       | 2         | 1     |
| Altiarchaeales                          |                       | 2         | 1     |
| Diapherotrites                          |                       | 2         | 2     |
| BJ-169                                  |                       | 1         | 1     |
| Hadesarchaea                            |                       | 1         | 1     |
| Marine Benthic Group E                  |                       | 1         | 1     |
| Miscellaneous Euryarchaeotic Group(MEG) |                       | 1         | 1     |
| WS6                                     |                       | 1         | 1     |

Supplementary Table 1. Number of sequences and OTUs recorded for all phyla and the major proteobacterial classes in the present study based on the Silva 128 database.

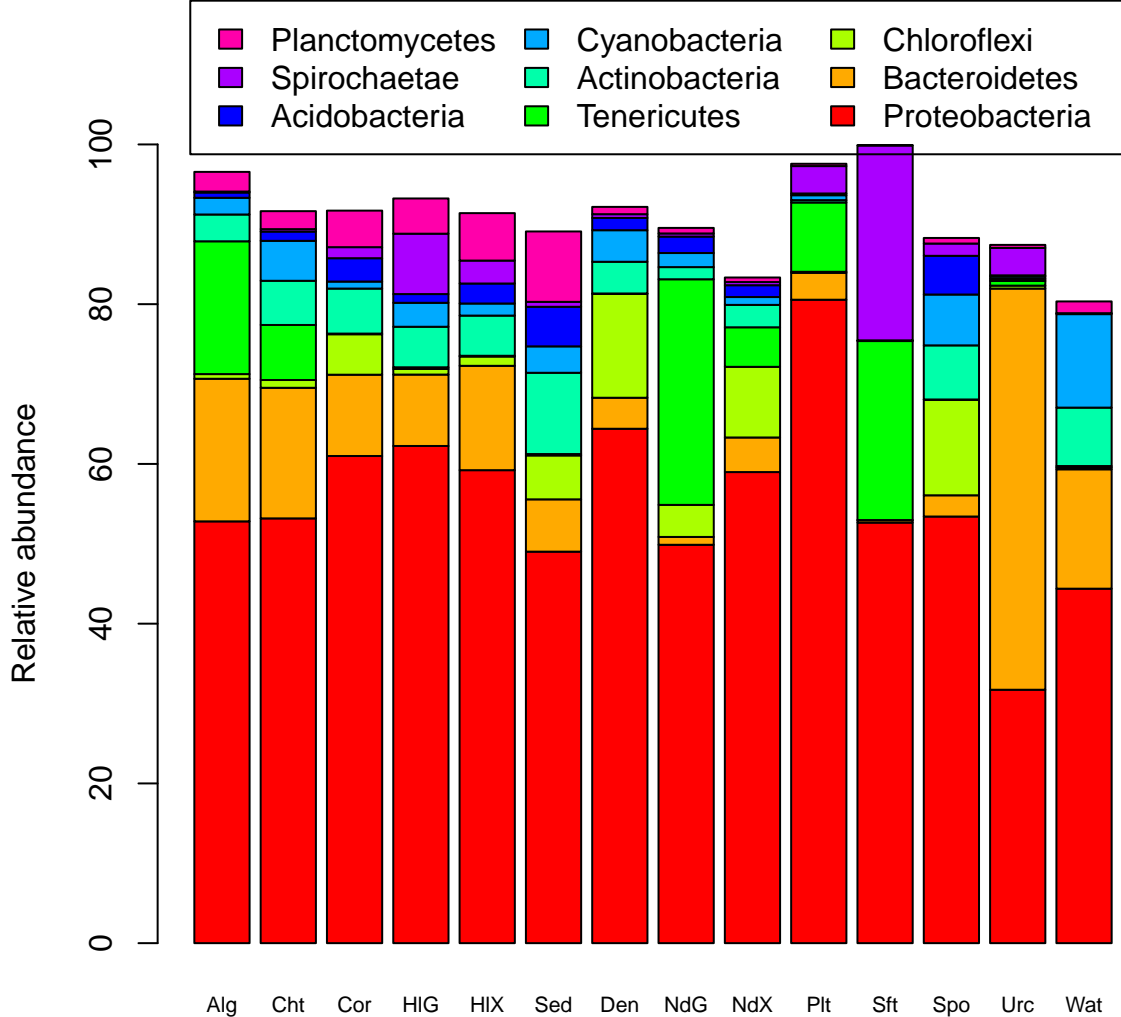

Supplementary Fig. 1: Stacked barplot of the relative abundance of the nine most abundant phyla in algae (Alg), chitons (Cht), stony corals (Cor), sea cucumber gut (HIG), sea cucumber mantle (HIX), flatworms (Plt), sediment (Sed), sponges (Spo), sponge denizens (Den), nudibranch gut (NdG), nudibranch mantle (NdX), flatworms (Plt), soft corals (Sft), sponges (Spo), sea urchins (Urc) and seawater (Wat). Source data are provided as a Source Data file.

## Rarefied richness

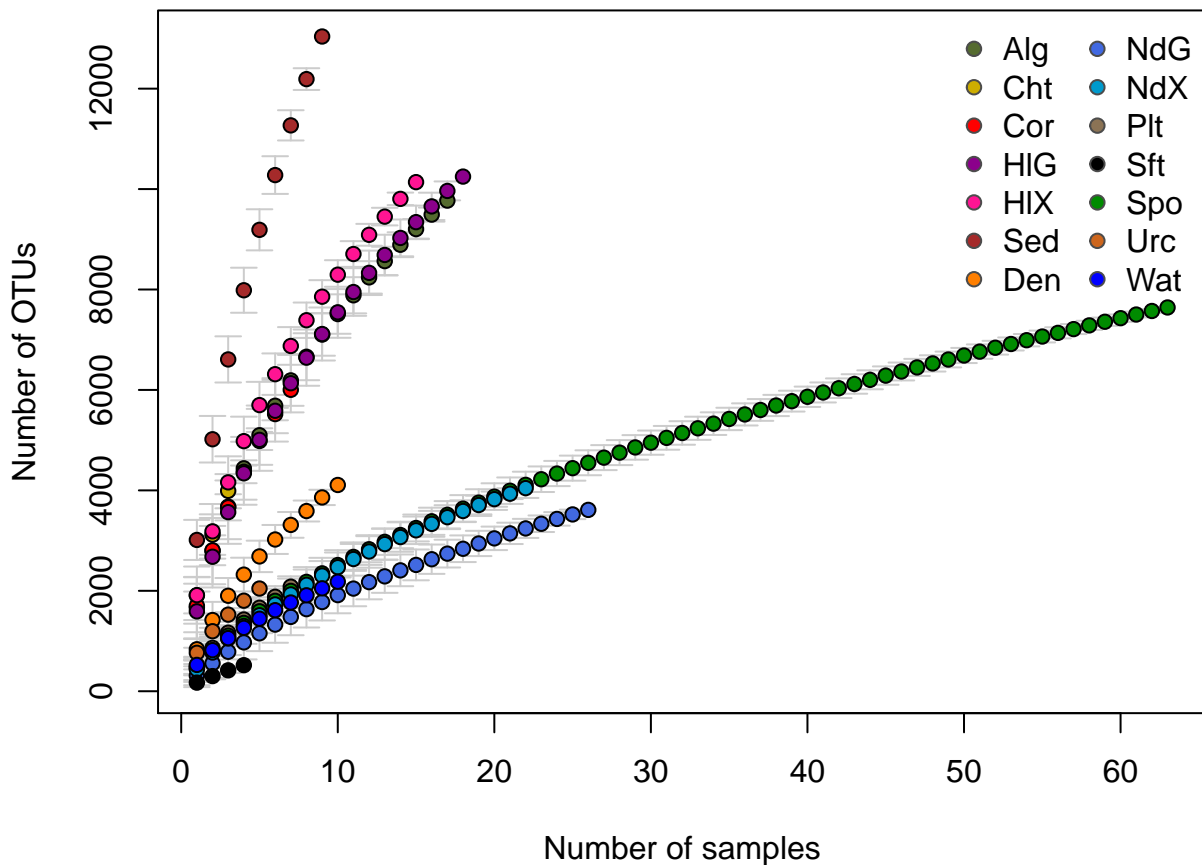

Supplementary Fig. 2. Cumulative OTU richness (error bars represent 95% confidence intervals) of algae (Alg), chitons (Cht), stony corals (Cor), sea cucumber gut (HIG), sea cucumber mantle (HIX), flatworms (Plt), sediment (Sed), sponges (Spo), sponge denizens (Den), nudibranch gut (NdG), nudibranch mantle (NdX), flatworms (Plt), soft corals (Sft), sponges (Spo), sea urchins (Urc) and seawater (Wat) estimated using the specaccum function in vegan with the 'method' argument set to 'random' and 999 permutations. Error bars represent a single standard deviation. Each sample represents 10000 sequences. Source data are provided as a Source Data file.

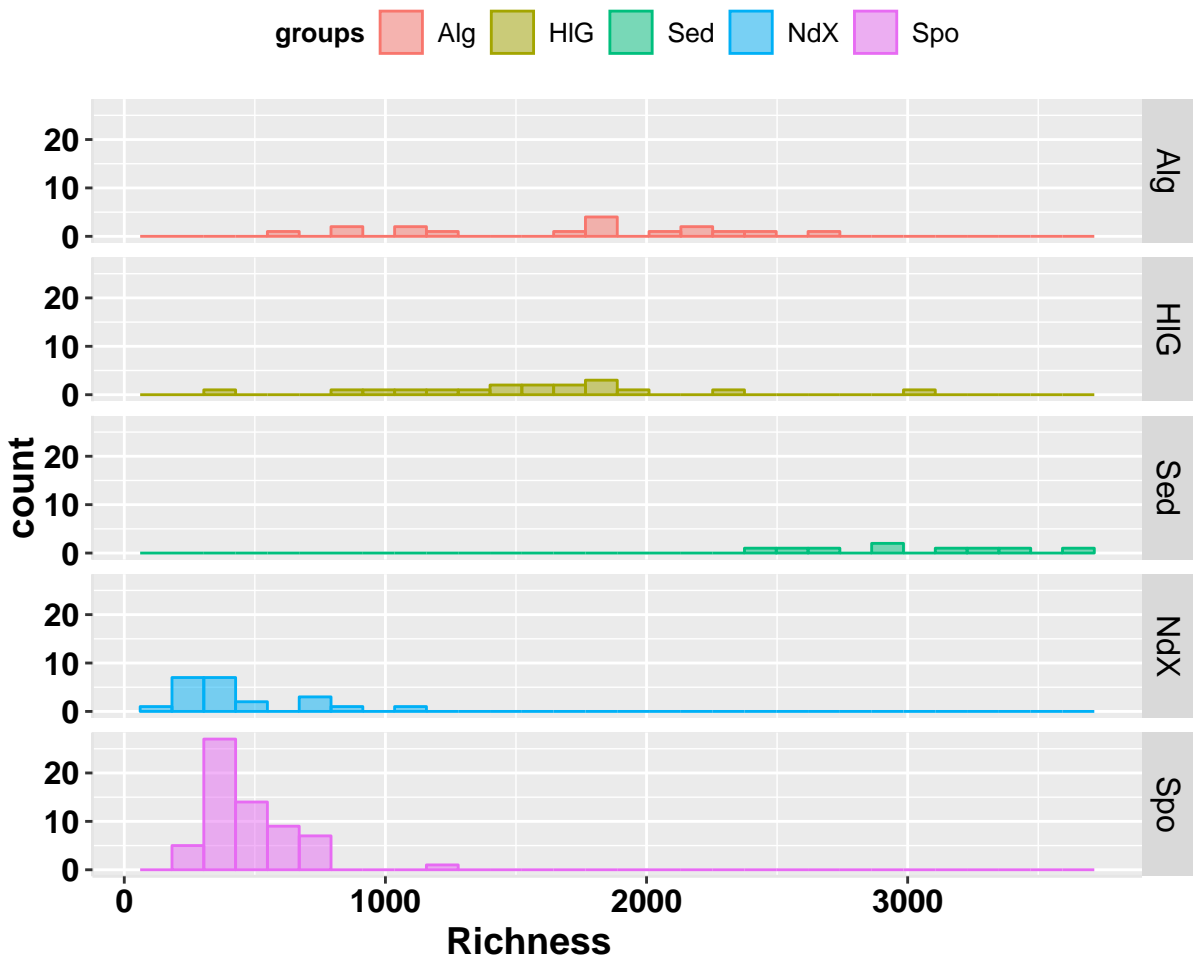

Supplementary Fig. 3. Histograms of richness counts for samples of algae (Alg), sea cucumber gut (HIG), sediment (Sed), sponges (Spo) and the nudibranch mantle (NdX) made with the `ggplot2.histogram` function in the `easyGgplot2` library in R. Source data are provided as a Source Data file.

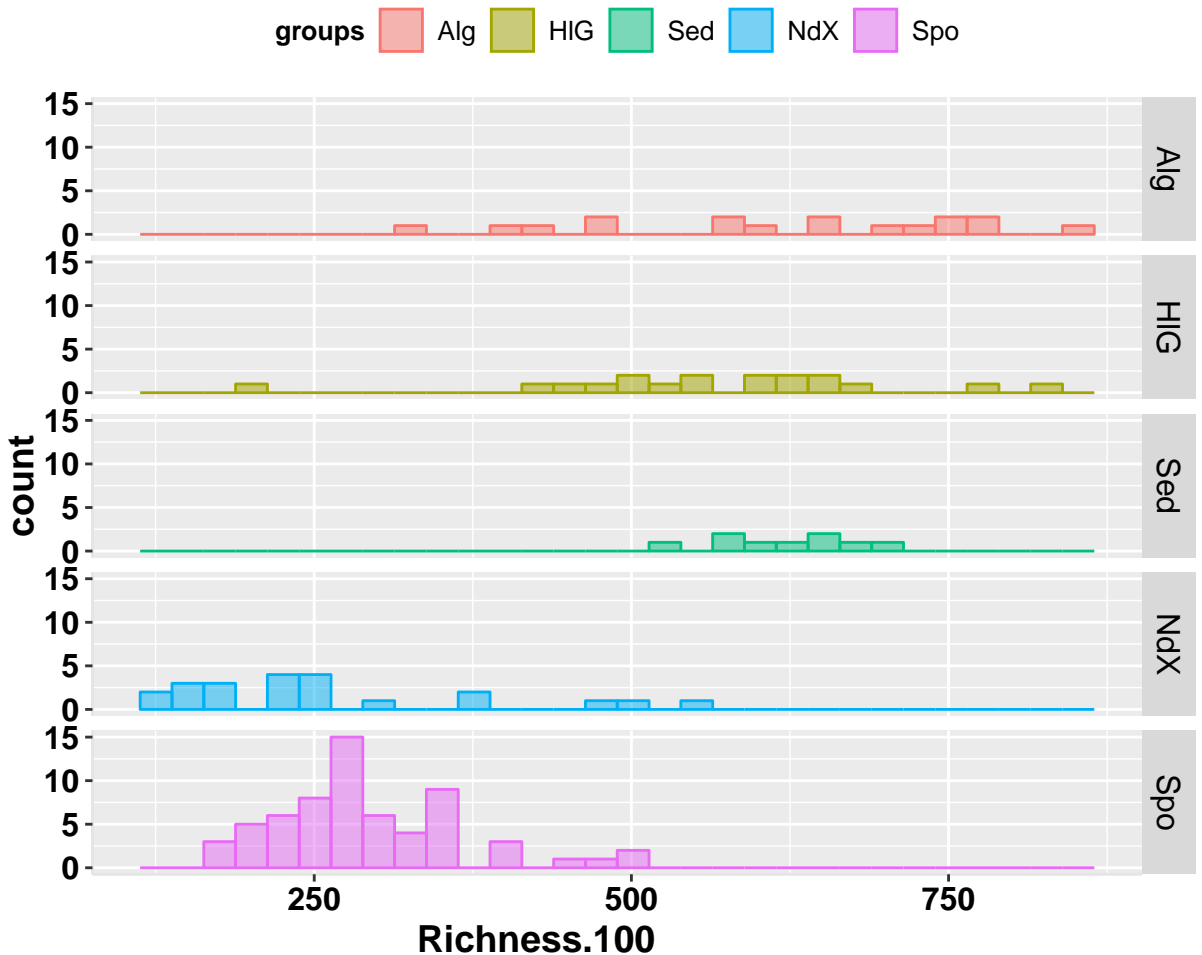

Supplementary Fig. 4. Histograms of richness counts, only including all OTUs > 100 sequences (OTUs100), for samples of algae (Alg), sea cucumber gut (HIG), sediment (Sed), sponges (Spo) and the nudibranch mantle (NdX) made with the ggplot2.histogram function in the easyGgplot2 library in R. Source data are provided as a Source Data file.

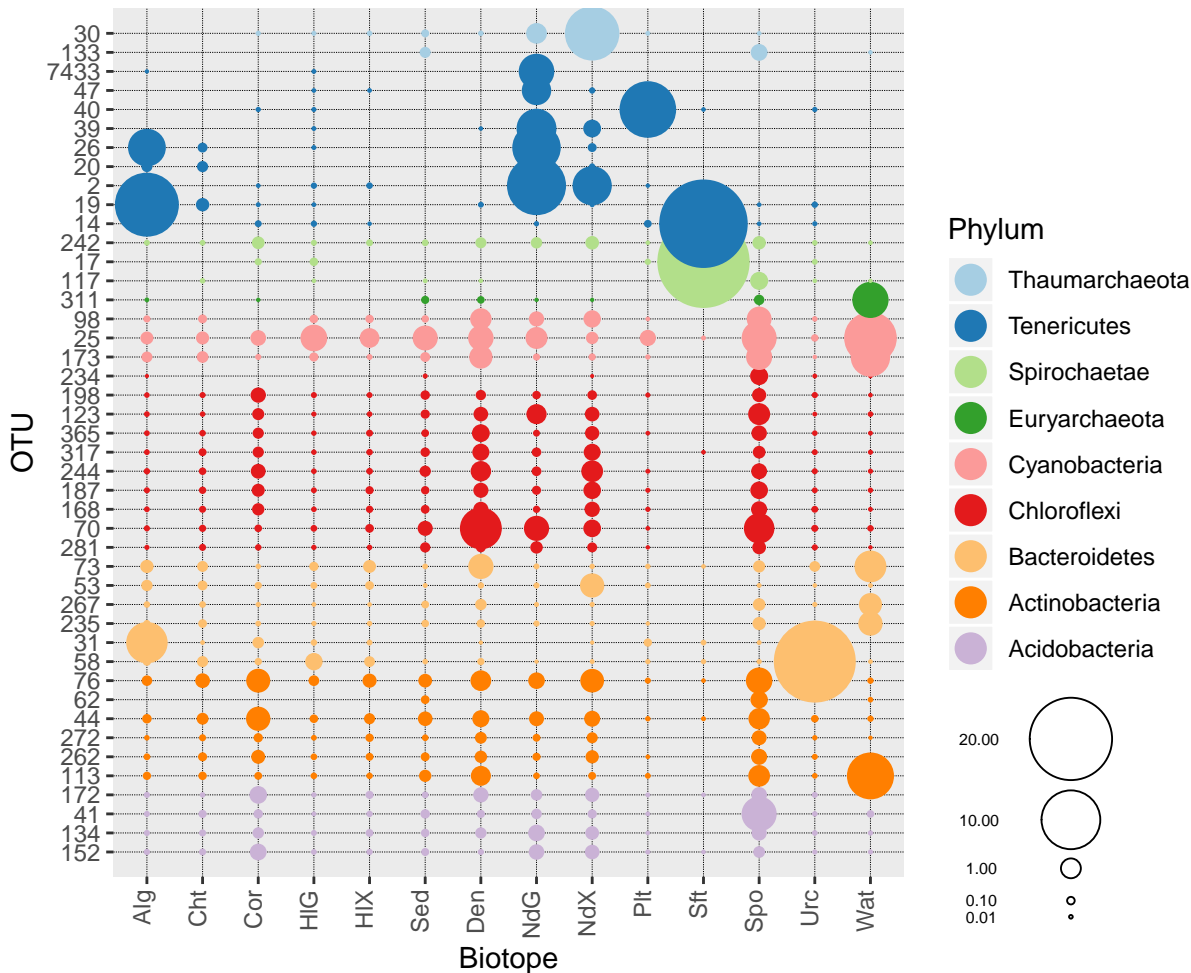

Supplementary Fig. 5. Relative abundance of the most abundant OTUs, colour-coded according to prokaryote phyla, in algae (Alg), chitons (Cht), stony corals (Cor), sea cucumber gut (HIG), sea cucumber mantle (HIX), flatworms (Plt), sediment (Sed), sponges (Spo), sponge denizens (Den), nudibranch gut (NdG), nudibranch mantle (NdX), flatworms (Plt), soft corals (Sft), sponges (Spo), sea urchins (Urc) and seawater (Wat). The phyla included are: Acidobacteria, Actinobacteria, Bacteroidetes, Chloroflexi, Cyanobacteria, Euryarchaeota, Spirochaetae, Tenericutes and Thaumarchaeota. The size of the symbol is proportional to the relative abundance of sequences represented by a given OTU. Source data are provided as a Source Data file.

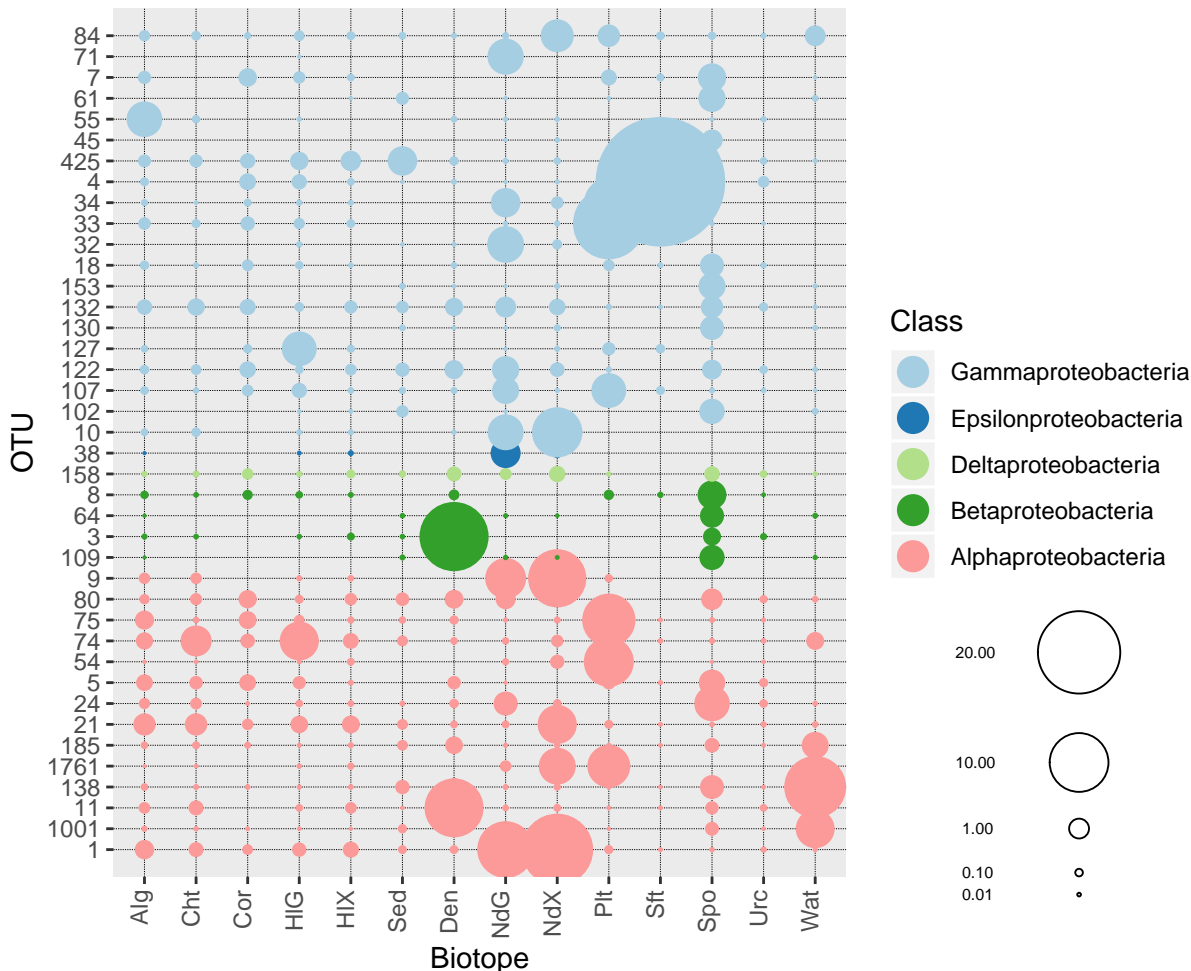

Supplementary Fig. 6. Relative abundance of the most abundant OTUs, colour-coded according to proteobacterial class, in algae (Alg), chitons (Cht), stony corals (Cor), sea cucumber gut (HIG), sea cucumber mantle (HIX), flatworms (Plt), sediment (Sed), sponges (Spo), sponge denizens (Den), nudibranch gut (NdG), nudibranch mantle (NdX), flatworms (Plt), soft corals (Sft), sponges (Spo), sea urchins (Urc) and seawater (Wat). The classes included are: Alphaproteobacteria, Betaproteobacteria, Deltaproteobacteria, Epsilonproteobacteria and Gammaproteobacteria. The size of the symbol is proportional to the relative abundance of sequences represented by a given OTU. The y-axis shows the OTU id number. Source data are provided as a Source Data file.



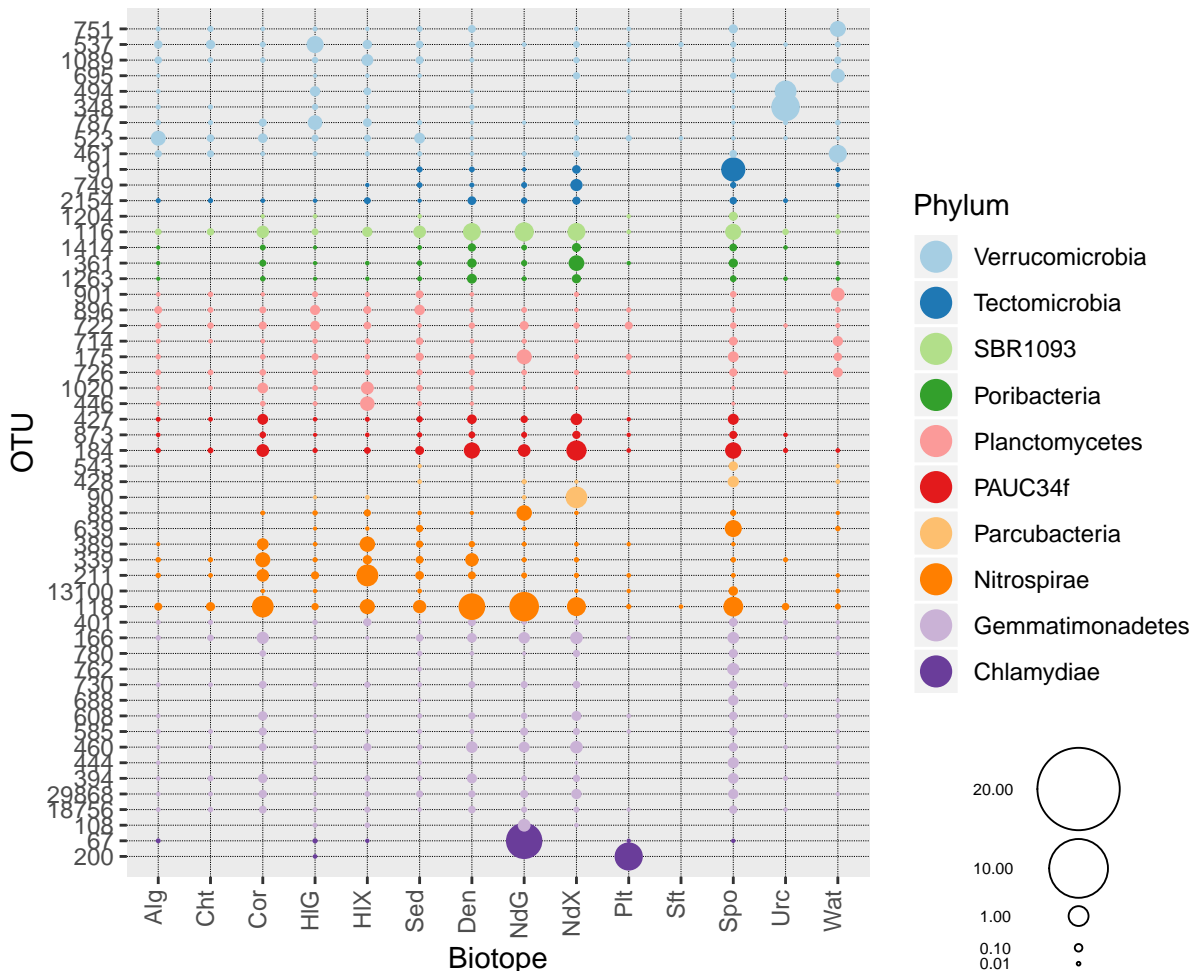

Supplementary Fig. 7. Relative abundance of OTUs, colour-coded according to prokaryote phyla, in algae (Alg), chitons (Cht), stony corals (Cor), sea cucumber gut (HIG), sea cucumber mantle (HIX), flatworms (Plt), sediment (Sed), sponges (Spo), sponge denizens (Den), nudibranch gut (NdG), nudibranch mantle (NdX), flatworms (Plt), soft corals (Sft), sponges (Spo), sea urchins (Urc) and seawater (Wat). The phyla included are: Chlamydiae, Gemmatimonadetes, Nitrospirae, Parcubacteria, PAUC34f, Planctomycetes, Poribacteria, SBR1093, Tectomicrobia and Verrucomicrobia. The size of the symbol is proportional to the relative abundance of sequences represented by a given OTU. The y-axis shows the OTU id number. Source data are provided as a Source Data file.
